# Supplementary material for: Monte Carlo method for assessment of a multimodal insertable biosensor
Source: PubMed Central journal article supplement (PMC9064117; doi:10.1117/1.jbo.27.8.083017), 2022-05-03
Supplement: JBO_027_083017_SD001.pdf [file JBO_027_083017_SD001.pdf]

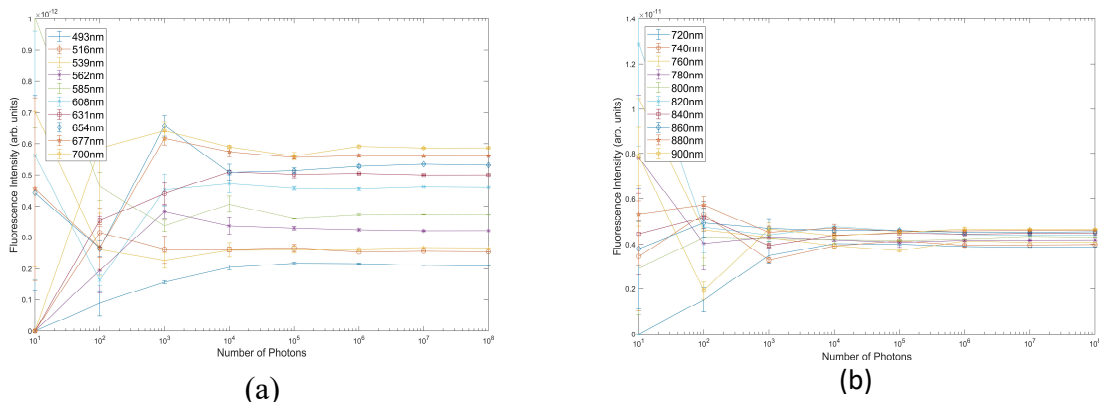

Fig. S1 (a) Parametric Convergence for 450nm-excited Monte Carlo Simulations (b) Parametric Convergence for 680nm-excited Monte Carlo Simulations

### Supplementary Note S1. Explanation of Parametric Analysis

Supplementary Fig. S1 shows parametric convergence for two biosensor iterations: one with an excitation of 450nm and one with an excitation of 680nm. As described in section 2.6, excitation and emission simulations with a target fluorophore of absorption coefficient and power yield of  $0.001\text{cm}^{-1}$  and 0.001 respectively were carried out with increasingly many photons in triplicate. It was found that the fluorescence intensity reaching the detector when  $10^7$  photons were used was within 5% of the fluorescence intensity reaching the detector when  $10^8$  photons were used, indicating that simulation output has converged at  $10^7$  photons in both cases.

### Supplementary Note S2. Number of Simulations Required for a Single Barcode Biosensor Iteration

Phosphorescence Lifetime Assay:

1. 1 excitation simulation (x3 for triplicate. 3 total)
2. 80 emission simulations (x3 for triplicate, 240 total)

## FRET Assay

1. 1 excitation simulation (x3 for triplicate, 3 total)
2. 80 donor dye emission simulations (x3 for triplicate, 240 total)
3. 80 acceptor dye emission simulations (x3 for triplicate, 240 total)
